# Supplementary material for: The strain effects in 2D hybrid organic–inorganic perovskite microplates: bandgap, anisotropy and stability
Source: Royal Society of Chemistry journal article supplement (doi:10.1039/d0nr00657b), 2020-01-01
Supplement: d0nr00657b1.pdf [file d0nr00657b1.pdf]

## Supplementary Information

### **The Strain Effects in 2D Hybrid Organic–Inorganic Perovskite Microplates: Bandgap, Anisotropy and Stability**

Shuai Wang,<sup>a#</sup> Zibo Gong,<sup>a#</sup> Guangxuan Li,<sup>a</sup> Zixiao Du,<sup>a</sup> Jiaqi Ma,<sup>a</sup> Hongzhi Shen,<sup>a</sup> Jiaqi Wang,<sup>a</sup> Wancai Li,<sup>a</sup> Junwen Ren,<sup>a</sup> Xinglin Wen,<sup>a</sup> and Dehui Li<sup>\*a,b</sup>

<sup>a</sup>School of Optical and Electronic Information, Huazhong University of Science and Technology, Wuhan, 430074, China

<sup>b</sup>Wuhan National Laboratory for Optoelectronics, Huazhong University of Science and Technology, Wuhan, 430074, China

# Those authors contribute equally to this work.

\*Correspondence author. Email: [dehuili@hust.edu.cn](mailto:dehuili@hust.edu.cn).

## Methods

**Sample Fabrication.** 2D perovskite crystals were synthesized according to the previously reported method.<sup>1</sup> The patterned nanopillars substrates were fabricated by electron beam lithography (TESCAN VEGA 3 SBH) and inductively coupled plasma etching on the Si substrate with a 100 nm SiO<sub>2</sub>. After fabricating the substrate, we mechanically exfoliated thin 2D perovskite microplates from their bulk crystals on a polydimethylsiloxane (PDMS) stamp. The thin microplates were then transferred to prefabricated patterned nanopillars substrate under the aid of microscope and manipulator.

**Material characterizations.** Both Optical and fluorescence images were taken on an Olympus BX53M system fluorescence microscope. We used a 50X objective with a long focal length of 6.0 mm and a numerical aperture (NA) of 0.60. Therefore, the diameter of the laser spot size on samples is around 2  $\mu\text{m}$ . The slit we used is around 200  $\mu\text{m}$  and thus the probe area would be the excited area, which is around 4  $\mu\text{m}^2$ . Since the area of the sample under single nano pillar is around 4~6  $\mu\text{m}^2$ , the PL spectra were collected on the center of the nanopillars. SEM and AFM images were acquired by a tungsten filament scanning electron microscope (TESCAN VEGA 3 SBH) and a Bruker Dimension EDGE, respectively. The room-temperature PL studies were carried out on a home-built micro-Raman spectrometer (Horiba HR550) in a backscattering configuration, which was equipped with a 600 g/mm grating. The excited sources are a 473-nm and a 405-nm solid-state lasers with a power of 0.1~1  $\mu\text{W}$ .

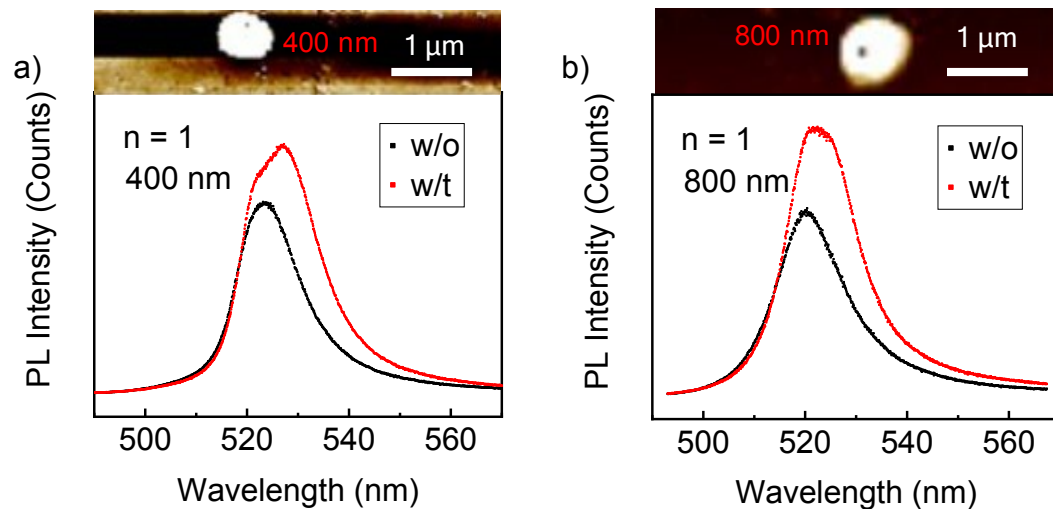

**Fig S1.** The PL spectra of  $(\text{BA})_2\text{PbI}_4$  ( $n=1$ ) microplates without (w/o) and with (w/t) applying external strain on 400 nm nanopillars (a) and 800 nm nanopillars (b). Black squares: without strain; red squares: with strain.

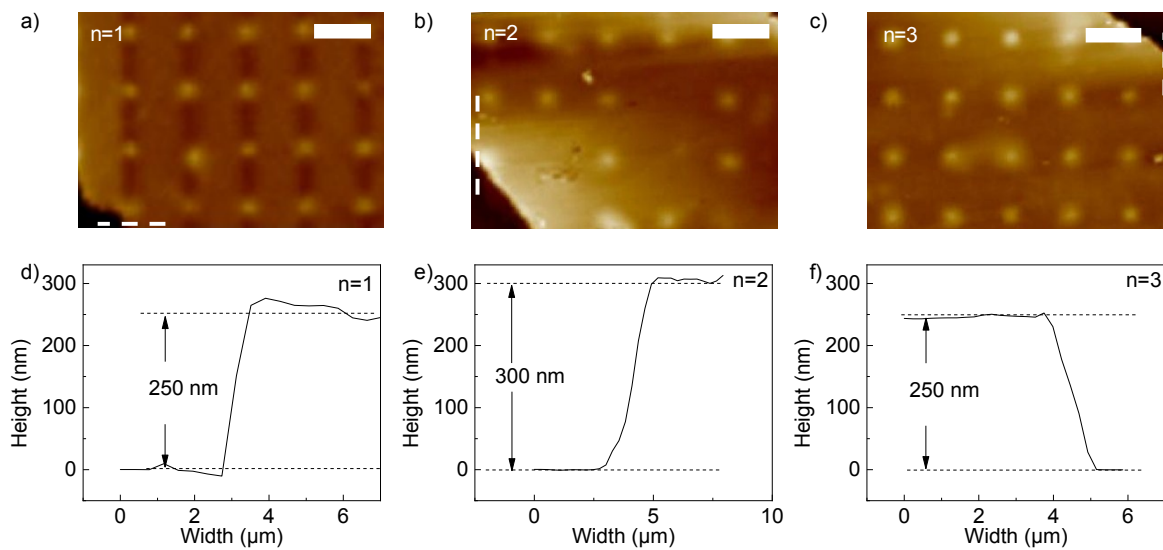

**Fig S2.** The atomic force microscopy images and extracted thickness of the as-exfoliated 2D perovskite  $(\text{BA})_2(\text{MA})_{n-1}\text{Pb}_n\text{I}_{3n+1}$  ( $n=1-3$ ) microplates. The scale bars are  $4\mu\text{m}$ .

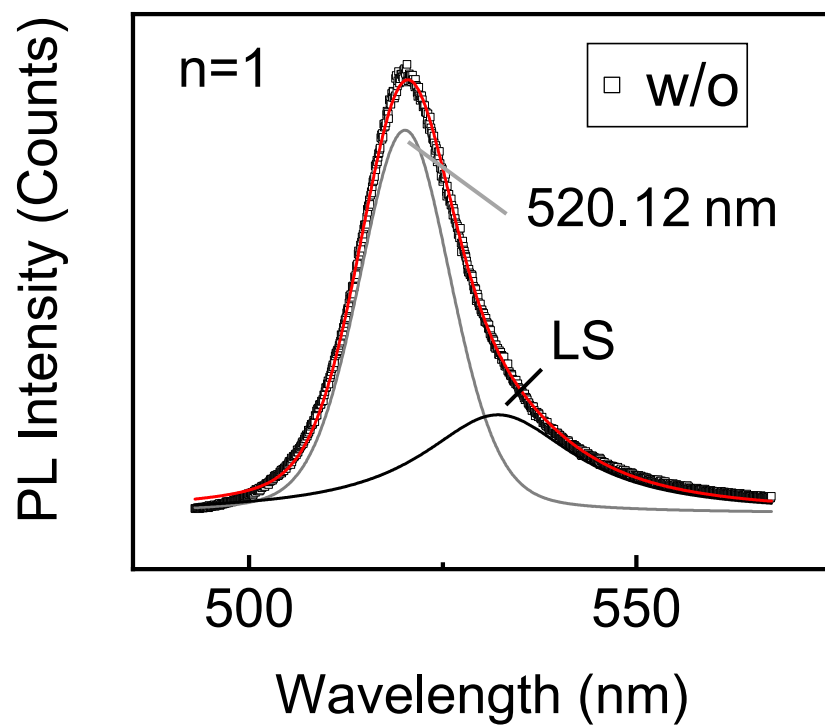

**Fig S3.** PL spectra with fitting results for  $(\text{BA})_2\text{PbI}_4$  ( $n=1$ ) without strain. Black hollow squares: experimental data points; grey line: emission peak; black line: the low-energy shoulder (LS); red line: the final result of the fitting.

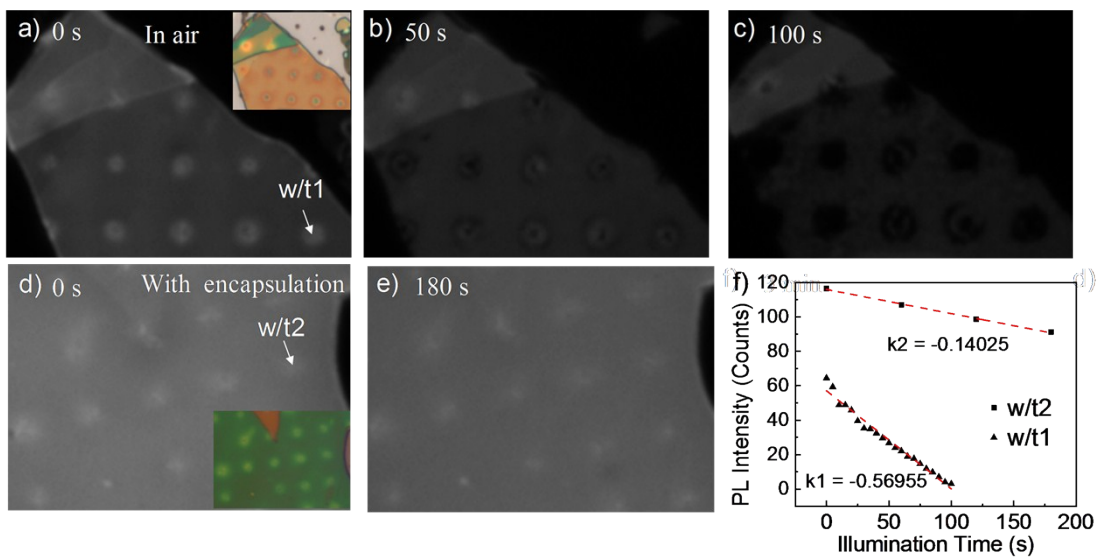

**Fig S4.** The continuous fluorescence mapping of  $(\text{BA})_2\text{PbI}_4$  ( $n=1$ ) microplates in air for 0 s (a)/50 s (b)/100 s (c) and with encapsulation for 0 s and 180 s. Inset in (a) and (d) corresponding to their optical images respectively. (f) The extracted PL intensity versus illumination time at w/t1 and w/t2. The red dashed lines are linearly fitting results.

**Table S1** Comparison of the change rate of the bandgap with the applied strain.

|                 | $(\text{BA})_2\text{PbI}_4^{\text{a}}$ | $(\text{BA})_2(\text{MA})\text{Pb}_2\text{I}_7^{\text{a}}$ | $(\text{BA})_2(\text{MA})_2\text{Pb}_3\text{I}_{10}^{\text{a}}$ | $(\text{BA})_2\text{PbBr}_4^{\text{b}}$ | $(\text{BA})_2(\text{MA})_4\text{Pb}_5\text{I}_{16}^{\text{c}}$ |
|-----------------|----------------------------------------|------------------------------------------------------------|-----------------------------------------------------------------|-----------------------------------------|-----------------------------------------------------------------|
| Rate<br>(mev/%) | -5.60                                  | -2.74                                                      | -1.38                                                           | -18                                     | 13.3                                                            |

<sup>a</sup> in our work    <sup>b</sup> from ref.<sup>2</sup>    <sup>c</sup> from ref.<sup>3</sup>

## References

- 1 C. C. Stoumpos, D. H. Cao, D. J. Clark, J. Young, J. M. Rondinelli, J. I. Jang, J. T. Hupp and M. G. Kanatzidis, *Chem. Mater.*, 2016, **28**, 2852-2867.
- 2 M. Xia, J. Yuan, J. Luo, W. Pan, H. Wu, Q. Chen, K.-H. Xue, X. Miao, G. Niu and J. Tang, *J. Mater. Chem. C*, 2020, DOI: 10.1039/C9TC06437K.
- 3 Q. Tu, I. Spanopoulos, S. Hao, C. Wolverton, M. G. Kanatzidis, G. S. Shekhawat and V. P. Dravid, *ACS Energy Lett.*, 2019, **4**, 796-802.
